# Supplementary material for: Effective amygdala-prefrontal connectivity predicts individual differences in successful emotion regulation
Source: PubMed Central journal article supplement — Soc Cogn Affect Neurosci. 2016 Dec 26;12(4):569–85. doi: 10.1093/scan/nsw169 (PMC5390747; doi:10.1093/scan/nsw169), 2016-12-26
Supplement: nsw169_supp.pdf [file nsw169_supp.pdf]

## Supplementary Material

### Effective amygdala-prefrontal connectivity predicts individual differences in successful emotion regulation

Carmen Morawetz. Stefan Bode. Juergen Baudewig. Hauke R. Heekeren

**Table S1:** Task-related PPI analysis for left amygdala seed

| Side                             | Region                   | Cluster Peak |     |     |     | Voxels | t-value |
|----------------------------------|--------------------------|--------------|-----|-----|-----|--------|---------|
|                                  |                          | BA           | x   | y   | z   |        |         |
| <b>Decrease&gt;Look Negative</b> |                          |              |     |     |     |        |         |
| RH                               | Precuneus*               | 31           | 24  | -79 | 28  | 514    | -5.18   |
| RH                               | Precuneus                | 31           | 24  | -79 | 28  | 229    | -5.18   |
| RH                               | Cuneus                   | 30           | 24  | -73 | 7   | 162    | -3.49   |
| RH                               | Middle Occipital Gyrus   | 19           | 39  | -76 | 7   | 59     | -3.35   |
| RH                               | Middle Occipital Gyrus   | 18           | 24  | -58 | 1   | 6      | -3.30   |
| RH                               | Fusiform Gyrus           | 37           | 48  | -55 | -14 | 17     | -2.52   |
| RH                               | Middle Temporal Gyrus    | 37           | 42  | -61 | -2  | 23     | -2.42   |
| LH                               | Supramarginal Gyrus*     | 40           | -54 | -49 | 25  | 593    | -4.61   |
| LH                               | Supramarginal Gyrus      | 40           | -54 | -49 | 25  | 123    | -4.61   |
| LH                               | Middle Temporal Gyrus    | 39           | -30 | -49 | 31  | 177    | -3.64   |
| LH                               | Cuneus                   | 19           | -27 | -76 | 31  | 199    | -3.59   |
| LH                               | Precuneus                | 7            | -21 | -67 | 28  | 9      | -3.44   |
| LH                               | Inferior Parietal Lobule | 40           | -45 | -49 | 40  | 9      | -3.17   |
| LH                               | Middle Temporal Gyrus    | 19           | -33 | -61 | 19  | 16     | -3.06   |
| LH                               | Precuneus                | 7            | -18 | -49 | 46  | 19     | -2.84   |
| LH                               | Precuneus                | 7            | -24 | -34 | 43  | 28     | -2.69   |
| LH                               | Caudate*                 |              | -18 | 26  | 4   | 259    | -4.03   |
| LH                               | Caudate                  |              | -18 | 26  | 4   | 74     | -4.03   |
| RH                               | Anterior Cingulate       | 24           | 9   | 32  | 10  | 86     | -3.96   |
| LH                               | Inferior Frontal Gyrus   | 47           | -33 | 35  | 1   | 39     | -3.37   |
| RH                               | Inferior Frontal Gyrus   | 11           | 24  | 35  | -17 | 41     | -3.23   |
| RH                               | Anterior Cingulate       | 10           | 18  | 41  | -8  | 11     | -3.08   |
| LH                               | Anterior Cingulate       |              | -9  | 35  | 1   | 8      | -3.07   |
| LH                               | Cuneus*                  | 7            | 0   | -64 | 31  | 104    | -3.78   |
| <b>Increase&gt;Look Negative</b> |                          |              |     |     |     |        |         |
| RH                               | Superior Temporal Gyrus* | 38           | 45  | 2   | -8  | 207    | 3.60    |
| RH                               | Superior Temporal Gyrus  | 38           | 45  | 2   | -8  | 162    | 3.60    |
| RH                               | Superior Temporal Gyrus  | 21           | 57  | -13 | -2  | 38     | 3.17    |
| RH                               | Middle Temporal Gyrus    | 21           | 66  | -19 | -8  | 7      | 2.62    |
| LH                               | Parahippocampal Gyrus*   | 34           | -30 | 5   | -17 | 100    | 3.24    |
| LH                               | Parahippocampal Gyrus    | 34           | -30 | 5   | -17 | 27     | 3.24    |
| LH                               | Superior Temporal Gyrus  | 38           | -39 | 14  | -20 | 35     | 3.06    |
| LH                               | Inferior Frontal Gyrus   | 47           | -39 | 23  | -8  | 33     | 2.92    |

FWE  $p < 0.05$ ,  $k=91$

maximum t-value. \*indicates cluster peak.

Peaks are identified with Talairach coordinates.

**Table S2:** Task-related PPI analysis for IFG seed region

| Side                             | Region                         | Coordinates |     |     | Voxels | t-value |       |
|----------------------------------|--------------------------------|-------------|-----|-----|--------|---------|-------|
|                                  |                                | BA          | x   | y   |        |         | z     |
| <b>Decrease&gt;Look Negative</b> |                                |             |     |     |        |         |       |
| RH                               | Superior Temporal Gyrus*       | 21          | 57  | -13 | -2     | 129     | 4.81  |
| RH                               | Superior Temporal Gyrus        | 21          | 57  | -13 | -2     | 105     | 4.81  |
| RH                               | Fusiform Gyrus                 | 20          | 51  | -4  | -26    | 24      | 3.42  |
| RH                               | Superior Frontal Gyrus*        | 10          | 9   | 65  | -2     | 154     | -3.71 |
| RH                               | Superior Frontal Gyrus         | 10          | 9   | 65  | -2     | 63      | -3.71 |
| LH                               | Superior Frontal Gyrus         | 10          | -12 | 65  | 1      | 91      | -3.44 |
| <b>Increase&gt;Look Negative</b> |                                |             |     |     |        |         |       |
| RH                               | Thalamus*                      |             | 3   | -10 | 7      | 2232    | 4.88  |
| RH                               | Thalamus                       |             | 3   | -10 | 7      | 271     | 4.88  |
| LH                               | Middle Temporal Gyrus          | 21          | -54 | -16 | -5     | 170     | 4.72  |
| LH                               | Sub-Gyral                      | 20          | -39 | -13 | -20    | 465     | 4.33  |
| LH                               | Thalamus                       |             | -3  | -22 | 7      | 235     | 4.21  |
| LH                               | Amygdala                       |             | -15 | -10 | -17    | 99      | 4.20  |
| LH                               | Parahippocampal Gyrus          | 35          | -21 | -22 | -23    | 24      | 3.98  |
| RH                               | Parahippocampal Gyrus          | 36          | 33  | -28 | -20    | 153     | 3.90  |
| LH                               | Cingulate Gyrus                | 24          | -3  | -4  | 25     | 40      | 3.87  |
| RH                               | Middle Temporal Gyrus          | 22          | 54  | -13 | -5     | 288     | 3.87  |
| RH                               | Fusiform Gyrus                 | 20          | 57  | -16 | -23    | 72      | 3.72  |
| RH                               | Parahippocampal Gyrus/Amygdala |             | 30  | -10 | -14    | 147     | 3.71  |
| LH                               | Inferior Frontal Gyrus         | 47          | -30 | 8   | -17    | 13      | 3.58  |
| LH                               | Lingual Gyrus                  | 18          | -12 | -58 | 7      | 31      | 3.50  |
| RH                               | Sub-Gyral                      | 21          | 45  | -1  | -14    | 5       | 3.28  |
| RH                               | Superior Temporal Gyrus        | 38          | 24  | 11  | -23    | 26      | 3.19  |
| LH                               | Posterior Cingulate            | 29          | -9  | -46 | 7      | 10      | 3.13  |
| RH                               | Anterior Cingulate             | 25          | 3   | 14  | -2     | 10      | 3.11  |
| RH                               | Inferior Temporal Gyrus        | 20          | 63  | -28 | -17    | 5       | 2.89  |
| RH                               | MidbrainRed Nucleus            |             | 6   | -22 | -17    | 15      | 2.87  |
| LH                               | Parahippocampal Gyrus          | 36          | -27 | -37 | -8     | 6       | 2.76  |
| RH                               | Caudate                        |             | 39  | -28 | -2     | 9       | 2.64  |
| RH                               | Superior Temporal Gyrus        | 38          | 45  | 11  | -11    | 13      | 2.62  |
| LH                               | Lentiform Nucleus              |             | -33 | -16 | -2     | 7       | 2.62  |
| LH                               | Middle Temporal Gyrus*         | 39          | -45 | -70 | 19     | 92      | 3.51  |
| LH                               | Middle Temporal Gyrus          | 39          | -45 | -70 | 19     | 67      | 3.51  |
| LH                               | Middle Occipital Gyrus         | 19          | -39 | -85 | 19     | 25      | 3.36  |
| LH                               | Postcentral Gyrus*             | 7           | -12 | -58 | 70     | 108     | 3.44  |
| LH                               | Postcentral Gyrus              | 7           | -12 | -58 | 70     | 62      | 3.44  |
| LH                               | Postcentral Gyrus              | 5           | -27 | -46 | 67     | 25      | 2.82  |
| RH                               | Superior Frontal Gyrus*        | 8           | 21  | 41  | 43     | 235     | -4.69 |
| RH                               | Superior Frontal Gyrus         | 8           | 21  | 41  | 43     | 93      | -4.69 |
| RH                               | Middle Frontal Gyrus           | 9           | 36  | 26  | 34     | 142     | -3.52 |
| LH                               | Anterior Cingulate*            | 32          | -15 | 38  | 10     | 253     | -3.98 |
| LH                               | Anterior Cingulate             | 32          | -15 | 38  | 10     | 97      | -3.98 |
| LH                               | Cingulate Gyrus                | 32          | -15 | 26  | 22     | 28      | -3.55 |

|    |                        |    |     |    |    |     |       |
|----|------------------------|----|-----|----|----|-----|-------|
| LH | Medial Frontal Gyrus   | 10 | -12 | 65 | 4  | 67  | -3.47 |
| LH | Superior Frontal Gyrus | 10 | -24 | 53 | 7  | 13  | -3.20 |
| LH | Anterior Cingulate     | 32 | -12 | 35 | 25 | 8   | -3.12 |
| LH | Middle Frontal Gyrus   | 46 | -42 | 44 | 7  | 40  | -3.10 |
| LH | Medial Frontal Gyrus*  | 6  | -6  | 17 | 46 | 115 | -3.64 |
| LH | Medial Frontal Gyrus   | 6  | -6  | 17 | 46 | 69  | -3.64 |
| LH | Medial Frontal Gyrus   | 8  | 0   | 26 | 40 | 11  | -2.96 |
| RH | Cingulate Gyrus        | 32 | 15  | 20 | 40 | 20  | -2.51 |
| LH | Medial Frontal Gyrus   | 8  | 0   | 38 | 37 | 15  | -2.44 |

FWE  $p < 0.05$ ,  $k = 91$

maximum t-value. \*indicates cluster peak.

Peaks are identified with Talairach coordinates.

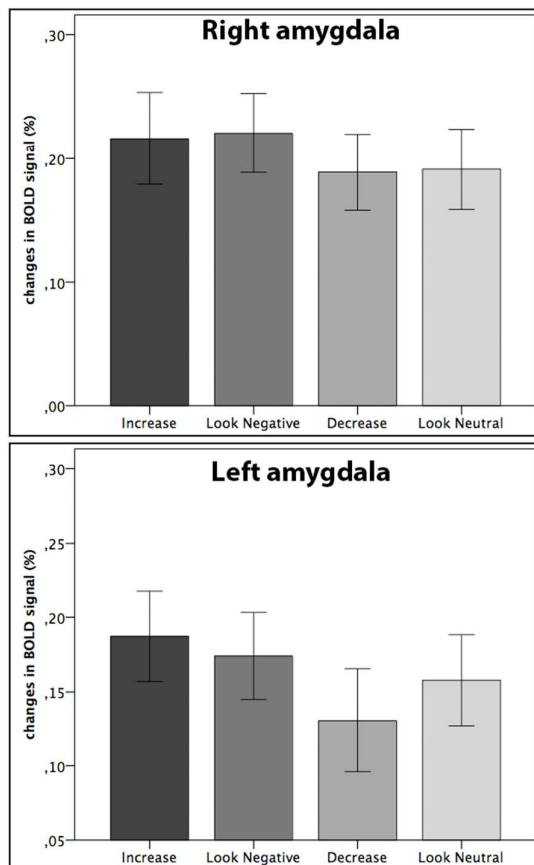

**Figure S1:** Activation profiles in bilateral amygdala ROIs.
